# Supplementary material for: Thermal and solvent effects on the triplet formation in cinnoline
Source: Royal Society of Chemistry journal article supplement (doi:10.1039/c3cp53247j), 2014-01-01
Supplement: c3cp53247j.pdf [file c3cp53247j.pdf]

# Thermal and Solvent Effects on the Triplet Formation in Cinnoline Electronic Supplementary Information

Mihajlo Etinski, Jörg Tatchen and Christel M. Marian

December 8, 2013

## 1 Figures

Figure 1: Duschinsky matrix related to the transition between the  $S_0$  and  $S_1(n\pi^*)$  states. In order to visualize the normal mode mixing, absolute values of the matrix elements  $J_{ij}$  are shown.

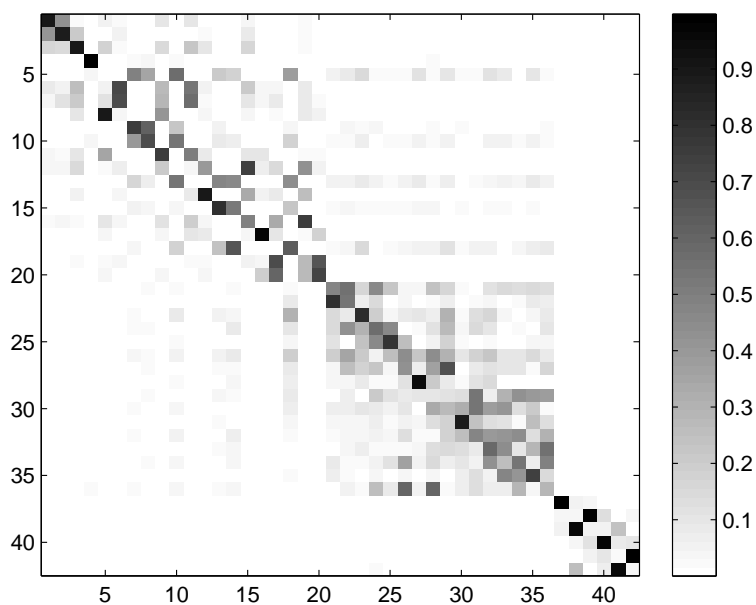

Figure 2: Duschinsky matrix related to the transition between the  $T_1(n\pi^*)$  and  $S_0$  states. In order to visualize the normal mode mixing, absolute values of the matrix elements  $J_{ij}$  are shown.

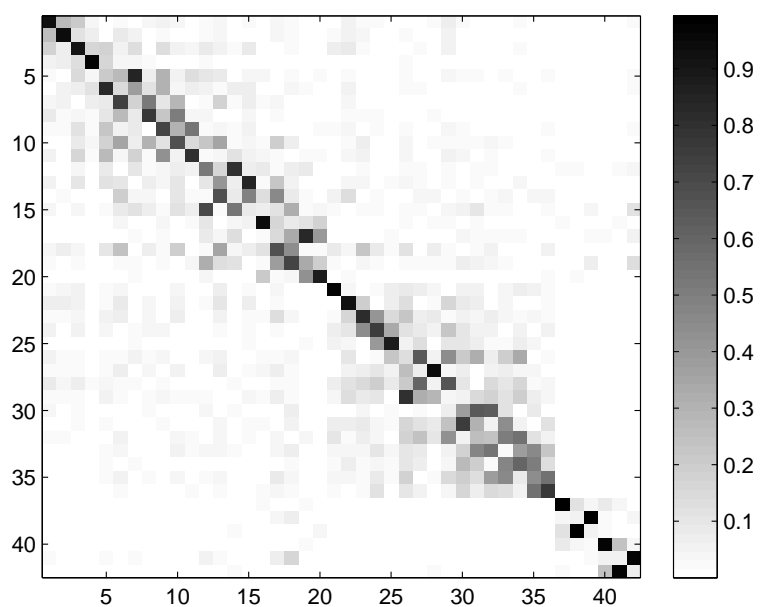

Figure 3: Duschinsky matrix related to the transition between the  $S_2(\pi\pi^*)$  and  $S_0$  states. In order to visualize the normal mode mixing, absolute values of the matrix elements  $J_{ij}$  are shown.

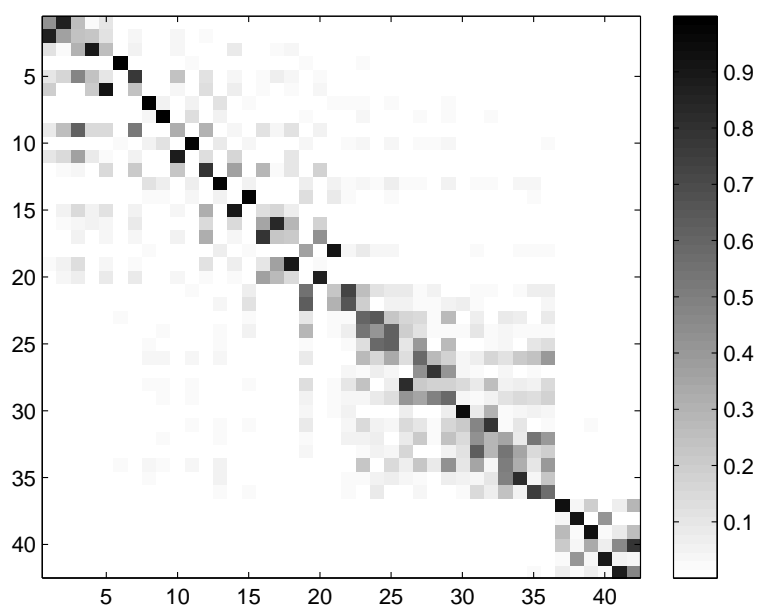

Figure 4: Duschinsky matrix related to the transition between the  $S_1(n\pi^*)$  and  $T_1(n\pi^*)$  states. In order to visualize the normal mode mixing, absolute values of the matrix elements  $J_{ij}$  are shown.

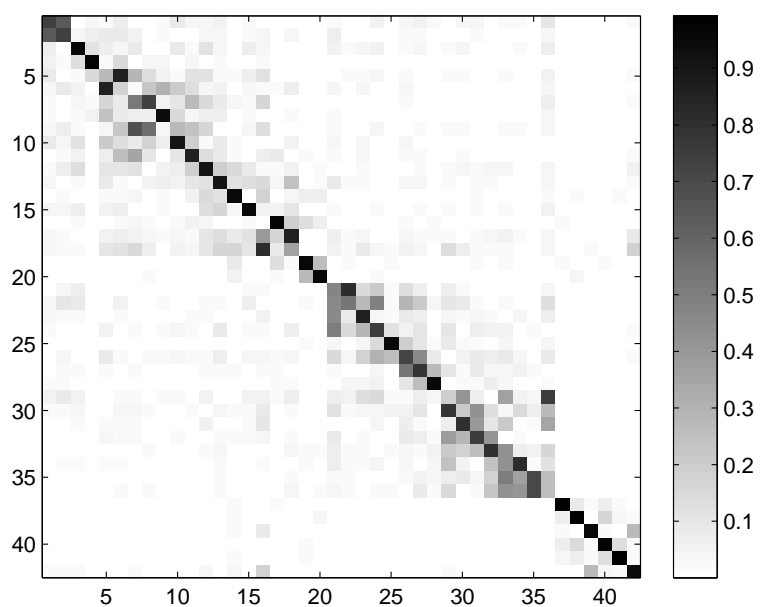

Figure 5: Duschinsky matrix related to the transition between the  $S_1(n\pi^*)$  and  $S_2(\pi\pi^*)$  states. In order to visualize the normal mode mixing, absolute values of the matrix elements  $J_{ij}$  are shown.

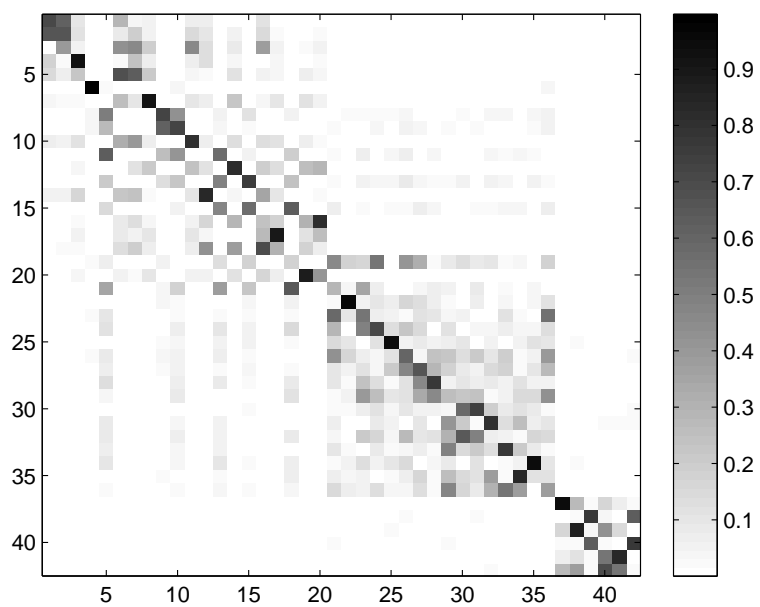

Figure 6: Energy level scheme of cinnoline at various minimum nuclear arrangements *in vacuo* (left) and in hydroxylic solution (right). For each nuclear arrangement, singlet levels are displayed on the left, triplet levels on the right side. Color code: blue  $n\pi^*$  states, red  $\pi\pi^*$  states.

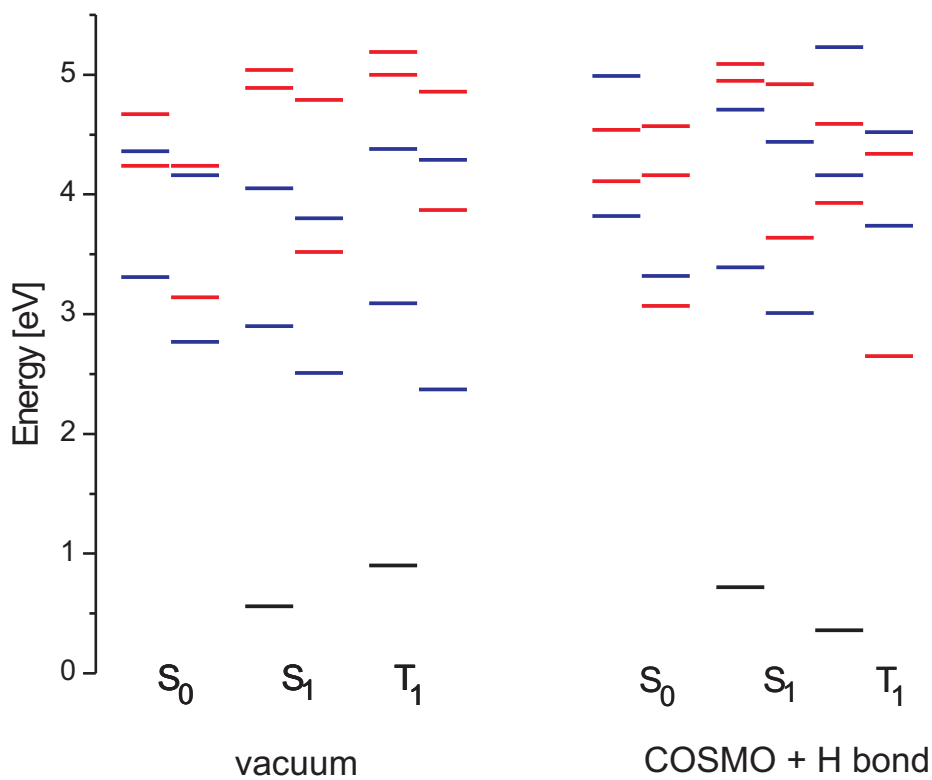

## 2 Tables

Table 1: Calculated  $S_0$  state harmonic frequencies (in  $\text{cm}^{-1}$ ) and intensities (in  $\text{km/mol}$ ) for cinnoline at the RI-CC2/cc-pVDZ level. Description: ip = in-plane, oop = out-of-plane, s = symmetric, a = antisymmetric

| $\nu$ | I    | Assign.                           | Exp. <sup>a</sup> | $\nu$ | I     | Assign.                           | Exp. <sup>a</sup> | $\nu$ | I     | Assign.                     | Exp. <sup>a</sup> |
|-------|------|-----------------------------------|-------------------|-------|-------|-----------------------------------|-------------------|-------|-------|-----------------------------|-------------------|
| 168   | 4.35 | oop ring bend.                    |                   | 846   | 40.46 | oop C-H bend. +<br>oop ring bend. | 844 vs            | 1291  | 8.99  | C-N str. +<br>ip C-H bend.  | 1392 s            |
| 174   | 1.69 | oop ring bend.                    |                   | 860   | 0.02  | oop C-H bend. +<br>oop ring bend. | 875 m             | 1429  | 4.01  | ring str. +<br>ip C-H bend. | 1416 m-s          |
| 363   | 0.71 | oop ring bend.                    |                   | 945   | 0.53  | oop C-H bend. +<br>oop ring bend. | 962 m             | 1442  | 1.93  | ring str. +<br>ip C-H bend. | 1440 m-s          |
| 363   | 2.40 | ip ring bend.                     | 373 s             | 953   | 1.39  | ip ring bend.                     | 1007 w-m          | 1476  | 9.88  | ring str.+<br>ip C-H bend.  | 1491 s            |
| 455   | 1.10 | oop ring bend.                    |                   | 958   | 0.01  | oop C-H bend. +<br>oop ring bend. | 1030 w            | 1518  | 5.67  | ring str. +<br>ip C-H bend. | 1538 w-m          |
| 460   | 4.80 | oop ring bend.                    | 470 s             | 963   | 0.33  | oop C-H bend. +<br>oop ring bend. | 1070 vw           | 1568  | 1.44  | ring str.<br>ip C-H bend.   | 1550 w-m          |
| 503   | 1.41 | ip ring bend.                     | 512 m             | 1028  | 2.46  | C-C str.                          | 1090 vs           | 1606  | 12.54 | ring str. +<br>ip C-H bend. | 1580 vs           |
| 526   | 0.54 | ip ring bend.                     | 530 m             | 1034  | 0.80  | C-N str.                          | 1117 vw           | 1661  | 2.55  | ring str. +<br>ip C-H bend. | 1620 m            |
| 602   | 0.40 | oop ring bend.                    | 633 m-s           | 1133  | 4.00  | ip ring bend.                     | 1138 m-s          | 3203  | 1.29  | C-H str. a                  | 2925              |
| 629   | 2.13 | ip ring bend.                     | 650 m-s           | 1155  | 2.33  | N-N str.                          | 1158 w-m          | 3206  | 3.17  | C-H str. a                  | 2966 sh.          |
| 706   | 1.86 | oop ring bend.                    | 716 vw            | 1160  | 1.68  | ring str. +<br>ip C-H bend.       | 1170 w?           | 3218  | 7.44  | C-H str. a                  | 2990 sh.          |
| 757   | 31.8 | oop C-H bend. +<br>oop ring bend. | 748 vs            | 1240  | 14.33 | ring str.                         | 1179 m-s          | 3230  | 9.09  | C-H str. a                  | 3016 sh.          |
| 773   | 1.8  | ring breath.                      | 774 m             | 1260  | 2.60  | ring str. +<br>ip C-H bend.       | 1258 m            | 3231  | 15.94 | C-H str. s                  | 3054              |
| 820   | 2.55 | ip ring bend.                     | 821 m             | 1284  | 2.51  | N-N str. +<br>C-N str.            | 1291 m-s          | 3241  | 7.54  | C-H str. s                  |                   |

<sup>a</sup> liquid phase IR spectrum, s = strong, m = medium, w = weak, v = very, sh = shoulder [1]



Table 2: Energies relative to the ground state minimum (eV), oscillator strengths for transitions to the ground state (in parentheses), and characters of the electronic states of cinnoline calculated at excited-state minimum geometries using the RI-CC2/aug-cc-pVDZ level of theory. Geometries were optimized at RI-CC2/cc-pVDZ level.

| State | $S_1(n\pi^*)$ geo        | $T_1(n\pi^*)$ geo        | $S_2(n\pi^*)$ geo         | $S_2(\pi\pi^*)$ geo      |
|-------|--------------------------|--------------------------|---------------------------|--------------------------|
| $S_0$ | 0.56                     | 0.90                     | 0.78                      | 0.17                     |
| $S_1$ | 2.90 (0.0012) $n\pi^*$   | 3.09 (0.0072) $n\pi^*$   | 3.30 (0.0013) $n\pi^*$    | 3.59 (0.0029) $n\pi^*$   |
| $S_2$ | 4.05 (0.0006) $n\pi^*$   | 4.38 (0.0034) $n\pi^*$   | 3.63 (0.0003) $n\pi^*$    | 4.03 (0.0372) $\pi\pi^*$ |
| $S_3$ | 4.89 (0.0215) $\pi\pi^*$ | 5.00 (0.0592) $\pi\pi^*$ | 5.07 (0.0073) $\pi\pi^*$  | 4.59 (0.0367) $\pi\pi^*$ |
| $S_4$ | 5.04 (0.0468) $\pi\pi^*$ | 5.19 (0.0554) $\pi\pi^*$ | 5.23 (0.0084) $n\sigma^*$ | 4.76 (0.0002) $n\pi^*$   |
| $T_1$ | 2.51 $n\pi^*$            | 2.37 $n\pi^*$            | 2.86 $n\pi^*$             | 2.95 $\pi\pi^*$          |
| $T_2$ | 3.52 $\pi\pi^*$          | 3.87 $\pi\pi^*$          | 3.46 $n\pi^*$             | 3.07 $n\pi^*$            |
| $T_3$ | 3.80 $n\pi^*$            | 4.29 $n\pi^*$            | 4.21 $\pi\pi^*$           | 4.17 $\pi\pi^*$          |
| $T_4$ | 4.79 $\pi\pi^*$          | 4.86 $\pi\pi^*$          | 4.97 $\pi\pi^*$           | 4.53 $\pi\pi^*$          |

Table 3: Calculated  $S_1(n\pi^*)$  state harmonic frequencies (in  $\text{cm}^{-1}$ ) and intensities (in  $\text{km/mol}$ ) for cinnoline at the RI-CC2/cc-pVDZ level. Description: ip = in-plane, oop = out-of-plane, s = symmetric, a = antisymmetric. Displacement of the  $S_1$  normal modes relative to the  $S_0$  modes in dimensionless harmonic oscillator coordinates

| $\nu$ | I     | Assign.                           | Displ. | $\nu$ | I     | Assign.                           | Displ. | $\nu$ | I     | Assign.    | Displ. |
|-------|-------|-----------------------------------|--------|-------|-------|-----------------------------------|--------|-------|-------|------------|--------|
| 159   | 2.48  | oop ring bend.                    | 0.000  | 767   | 27.85 | ip ring bend.                     | -0.962 | 1338  | 27.45 | C-C str.   | 0.914  |
| 169   | 2.13  | oop ring bend.                    | 0.000  | 781   | 27.59 | oop C-H bend. +<br>oop ring bend. | 0.001  | 1373  | 4.54  | ring str.  | 0.144  |
| 279   | 0.04  | oop ring bend.                    | 0.000  | 795   | 0.06  | oop C-H bend. +<br>oop ring bend. | 0.000  | 1408  | 3.91  | ring str.  | 0.299  |
| 367   | 2.63  | ip ring bend.                     | 0.461  | 826   | 2.40  | ip ring bend.                     | 0.272  | 1438  | 1.00  | ring str.  | 0.087  |
| 394   | 7.20  | ip ring bend.                     | 0.273  | 859   | 1.32  | oop C-H bend. +<br>oop ring bend. | -0.001 | 1522  | 32.29 | ring str.  | 0.415  |
| 408   | 0.90  | oop ring bend.                    | 0.001  | 914   | 0.08  | oop C-H bend. +<br>oop ring bend. | 0.000  | 1547  | 61.82 | ring str.  | -0.498 |
| 475   | 3.61  | oop ring bend.                    | -0.001 | 1015  | 43.19 | C-C str.                          | -0.019 | 1579  | 63.52 | ring str.  | 0.110  |
| 497   | 0.01  | oop ring bend.                    | 0.004  | 1038  | 2.05  | ring str.                         | -0.050 | 1656  | 95.97 | N-N str.   | -0.528 |
| 506   | 2.00  | ip ring bend.                     | 1.874  | 1075  | 29.51 | ring str.                         | -0.309 | 3198  | 4.42  | C-H str. a | 0.000  |
| 540   | 1.48  | ip ring bend.                     | 0.549  | 1118  | 35.45 | ring str.                         | 0.642  | 3214  | 7.15  | C-H str. a | -0.002 |
| 561   | 1.54  | oop ring bend.                    | 0.000  | 1162  | 1.93  | C-C str.                          | -0.114 | 3223  | 1.91  | C-H str.   | 0.037  |
| 610   | 24.24 | oop C-H bend. +<br>oop ring bend. | 0.000  | 1203  | 41.48 | ring str.                         | 0.591  | 3226  | 16.21 | C-H str. a | 0.001  |
| 702   | 10.09 | ip ring bend.                     | 1.153  | 1212  | 13.32 | ring str.                         | 0.307  | 3238  | 6.01  | C-H str. s | -0.004 |
| 729   | 56.72 | oop C-H bend. +<br>oop ring bend. | 0.001  | 1257  | 16.25 | ring str.                         | -0.023 | 3273  | 0.23  | C-H str.   | -0.034 |

Table 4: Calculated  $S_2(n\pi^*)$  state harmonic frequencies (in  $\text{cm}^{-1}$ ) and intensities (in  $\text{km/mol}$ ) for cinnoline at the RI-CC2/cc-pVDZ level. Description: ip = in-plane, oop = out-of-plane, s = symmetric, a = antisymmetric

| $\nu$ | I     | Assign.                           | $\nu$ | I     | Assign.                           | $\nu$ | I      | Assign.    |
|-------|-------|-----------------------------------|-------|-------|-----------------------------------|-------|--------|------------|
| 146   | 2.06  | oop ring bend.                    | 734   | 28.30 | ip ring bend.                     | 1327  | 13.64  | ring str.  |
| 158   | 0.01  | oop ring bend.                    | 770   | 0.02  | oop C-H bend. +<br>oop ring bend. | 1381  | 10.54  | ring str.  |
| 264   | 2.48  | oop ring bend.                    | 861   | 8.08  | oop C-H bend. +<br>oop ring bend. | 1415  | 0.68   | ring str.  |
| 310   | 5.92  | oop ring bend.                    | 870   | 28.34 | ip ring bend.                     | 1479  | 2.41   | ring str.  |
| 344   | 0.70  | ip ring bend.                     | 895   | 0.02  | oop C-H bend. +<br>oop ring bend. | 1569  | 11.74  | C-C str.   |
| 363   | 24.45 | oop ring bend.                    | 908   | 22.04 | C-N str.                          | 1602  | 12.15  | C-C str.   |
| 408   | 2.20  | oop ring bend.                    | 909   | 0.82  | oop C-H bend. +<br>oop ring bend. | 1676  | 373.41 | N-N str.   |
| 468   | 12.36 | ip ring bend.                     | 971   | 16.92 | C-C str.                          | 2481  | 200.34 | ring str.  |
| 490   | 2.65  | oop ring bend.                    | 1103  | 11.70 | ip ring bend.                     | 3186  | 1.98   | C-H str. a |
| 506   | 6.99  | ip ring bend.                     | 1150  | 1.03  | ring str.                         | 3189  | 12.96  | C-H str. a |
| 542   | 16.31 | oop C-H bend. +<br>oop ring bend. | 1162  | 1.12  | ring str.                         | 3215  | 3.04   | C-H str. a |
| 589   | 45.55 | ip ring bend.                     | 1202  | 2.05  | ring str.                         | 3224  | 11.65  | C-H str. a |
| 704   | 51.63 | oop C-H bend. +<br>oop ring bend. | 1238  | 19.62 | ring str.                         | 3236  | 10.03  | C-H str. s |
| 705   | 20.28 | ip ring bend.                     | 1306  | 5.71  | ring str.                         | 3329  | 8.18   | C-H str.   |

Table 5: Calculated  $S_2(\pi\pi^*)$  state harmonic frequencies (in  $\text{cm}^{-1}$ ) and intensities (in  $\text{km/mol}$ ) for cinnoline at the RI-CC2/cc-pVDZ level. Description: ip = in-plane, oop = out-of-plane, s = symmetric, a = antisymmetric. Displacement of the  $S_2(\pi\pi^*)$  normal modes relative to the  $S_1(n\pi^*)$  modes in dimensionless harmonic oscillator coordinates

| $\nu$ | I     | Assign.                           | Displ. | $\nu$ | I      | Assign.                             | Displ. | $\nu$ | I      | Assign.                     | Displ. |
|-------|-------|-----------------------------------|--------|-------|--------|-------------------------------------|--------|-------|--------|-----------------------------|--------|
| 86    | 6.94  | oop ring bend.                    | 0.000  | 788   | 6.50   | ip ring bend.                       | -1.400 | 1268  | 148.77 | ring str. +<br>ip C-H bend. | 0.722  |
| 151   | 0.20  | oop ring bend.                    | 0.000  | 814   | 2.37   | oop C-H bend.<br>+ oop ring bend.   | 0.002  | 1394  | 53.52  | ring str. +<br>ip C-H bend. | -0.266 |
| 214   | 8.82  | oop ring bend.                    | 0.000  | 842   | 0.25   | oop C-H bend.<br>+ oop ring bend.   | 0.002  | 1426  | 44.81  | ring str. +<br>ip C-H bend. | -0.248 |
| 286   | 0.29  | oop ring bend.                    | 0.000  | 882   | 2.38   | oop C-H bend.<br>+ oop ring bend.   | -0.001 | 1435  | 25.70  | ring str. +<br>ip C-H bend. | 0.096  |
| 350   | 0.35  | oop ring bend.                    | -0.001 | 896   | 16.42  | ip ring bend.                       | -1.033 | 1486  | 46.55  | ring str. +<br>ip C-H bend. | 0.473  |
| 356   | 4.39  | ip ring bend.                     | 0.361  | 903   | 3.57   | oop C-H bend. +<br>+ oop ring bend. | -0.003 | 1509  | 52.16  | ring str. +<br>ip C-H bend. | 0.446  |
| 395   | 5.04  | oop ring bend.                    | 0.000  | 930   | 0.43   | ip ring bend.                       | 1.035  | 1580  | 15.36  | ring str. +<br>ip C-H bend. | 0.453  |
| 467   | 23.03 | ip ring bend.                     | -1.854 | 998   | 19.32  | C-C str.                            | -0.772 | 1682  | 97.19  | ring str. +<br>ip C-H bend. | -0.357 |
| 506   | 17.21 | ip ring bend.                     | 1.494  | 1043  | 100.54 | N-N str.                            | -0.894 | 3196  | 5.27   | C-H str. a                  | 0.007  |
| 576   | 0.16  | oop ring bend.                    | 0.015  | 1098  | 3.50   | ring str.                           | 0.394  | 3201  | 15.57  | C-H str. a                  | 0.040  |
| 577   | 49.00 | ip ring bend.                     | 1.388  | 1133  | 89.38  | ring str. + ip C-H bend.            | -0.066 | 3213  | 4.36   | C-H str. a                  | 0.012  |
| 677   | 45.22 | oop C-H bend.<br>+ oop ring bend. | 0.000  | 1204  | 18.06  | ring str.                           | 0.452  | 3217  | 26.37  | C-H str. s                  | 0.062  |
| 705   | 22.83 | ring breath.                      | 1.158  | 1238  | 99.42  | ring str. +<br>ip C-H bend.         | 0.426  | 3229  | 3.23   | C-H str. a                  | 0.002  |
| 737   | 10.75 | oop C-H bend.<br>+ oop ring bend. | 0.000  | 1245  | 34.99  | ring str. +<br>ip C-H bend.         | 0.111  | 3249  | 3.68   | C-H str. s                  | 0.032  |

Table 6: Calculated  $T_1(n\pi^*)$  state harmonic frequencies (in  $\text{cm}^{-1}$ ) and intensities (in  $\text{km/mol}$ ) for cinnoline at the RI-CC2/cc-pVDZ level. Description: ip = in-plane, oop = out-of-plane, s = symmetric, a = antisymmetric. Displacement of the  $T_1(n\pi^*)$  normal modes relative to the  $S_1(n\pi^*)$  modes in dimensionless harmonic oscillator coordinates

| $\nu$ | I     | Assign.                           | Displ. | $\nu$ | I     | Assign.                          | Displ. | $\nu$ | I     | Assign.    | Displ. |
|-------|-------|-----------------------------------|--------|-------|-------|----------------------------------|--------|-------|-------|------------|--------|
| 147   | 6.35  | oop ring bend.                    | 2.338  | 768   | 32.32 | ring breath.                     | 0.493  | 1310  | 26.72 | N-N str.   | 0.414  |
| 170   | 1.33  | oop ring bend.                    | 0.601  | 836   | 0.36  | oop C-H bend +<br>oop ring bend. | 0.138  | 1380  | 26.63 | ring str.  | -0.595 |
| 311   | 8.42  | oop ring bend.                    | 1.937  | 851   | 6.91  | ip ring bend.                    | 0.111  | 1400  | 14.60 | ring str.  | 0.068  |
| 361   | 1.28  | ip ring bend.                     | 0.124  | 894   | 10.29 | oop C-H bend +<br>oop ring bend. | 0.184  | 1431  | 2.25  | ring str.  | 0.188  |
| 412   | 22.45 | oop ring bend.                    | -1.356 | 897   | 1.91  | oop C-H bend +<br>oop ring bend. | 0.027  | 1469  | 1.43  | ring str.  | -0.197 |
| 448   | 10.84 | ip ring bend.                     | -0.240 | 930   | 0.08  | oop C-H bend +<br>oop ring bend. | 0.011  | 1523  | 34.47 | ring str.  | 0.115  |
| 477   | 1.97  | oop ring bend.                    | -0.192 | 1037  | 18.41 | ring str.                        | 0.352  | 1587  | 4.92  | ring str.  | 0.054  |
| 503   | 8.72  | ip ring bend.                     | -0.302 | 1046  | 41.85 | ring str.                        | -0.713 | 1594  | 12.30 | ring str.  | -0.055 |
| 535   | 5.26  | oop ring bend.                    | 0.612  | 1089  | 14.44 | ring str.                        | -0.286 | 3200  | 3.92  | C-H str. a | -0.016 |
| 557   | 8.33  | ip ring bend.                     | -0.532 | 1111  | 4.46  | ring str.                        | 0.506  | 3215  | 4.75  | C-H str. a | 0.004  |
| 633   | 6.97  | oop ring bend.                    | -0.618 | 1164  | 0.10  | ring str.                        | 0.011  | 3223  | 1.52  | C-H str. a | -0.102 |
| 701   | 18.39 | oop C-H bend. +<br>oop ring bend. | -0.648 | 1199  | 19.34 | C-N str.                         | 0.210  | 3230  | 11.20 | C-H str. a | -0.001 |
| 729   | 18.21 | ip ring bend.                     | 0.296  | 1222  | 1.44  | ring str.                        | 0.206  | 3239  | 10.24 | C-H str. s | 0.001  |
| 750   | 74.98 | oop C-H bend +<br>oop ring bend.  | 0.301  | 1263  | 5.25  | ring str.                        | -0.026 | 3245  | 11.02 | C-H str. s | 0.219  |

Table 7: Displacements of the ground state normal modes relative to the  $T_1(n\pi^*)$  and  $S_2(\pi\pi^*)$  state normal modes in dimensional harmonic oscillator coordinates.

| $\nu$ | Displ. ( $T_1$ ) | Displ. ( $S_2$ ) | $\nu$ | Displ. ( $T_1$ ) | Displ. ( $S_2$ ) | $\nu$ | Displ. ( $T_1$ ) | Displ. ( $S_2$ ) |
|-------|------------------|------------------|-------|------------------|------------------|-------|------------------|------------------|
| 3241  | 0.025            | 0.028            | 1284  | 0.467            | -0.272           | 820   | 0.811            | 0.074            |
| 3231  | 0.233            | 0.012            | 1260  | 0.306            | 0.002            | 773   | -0.839           | 0.601            |
| 3230  | 0.001            | -0.028           | 1240  | 0.787            | -0.327           | 757   | 0.146            | 0.000            |
| 3218  | 0.001            | 0.006            | 1160  | 0.21             | 0.078            | 706   | -2.149           | 0.000            |
| 3206  | -0.057           | 0.015            | 1155  | -0.815           | 0.306            | 629   | -1.014           | 0.524            |
| 3203  | 0.006            | -0.013           | 1133  | -0.373           | 0.152            | 602   | -1.257           | 0.00             |
| 1661  | -0.161           | -0.056           | 1034  | -1.001           | 0.688            | 526   | -1.317           | -0.020           |
| 1606  | 0.232            | -0.004           | 1028  | 0.309            | 0.011            | 503   | -0.594           | 1.112            |
| 1568  | 0.263            | -0.272           | 963   | -0.049           | 0                | 460   | -1.111           | 0.000            |
| 1518  | 0.418            | 0.084            | 958   | 0.369            | 0                | 455   | 0.665            | 0.000            |
| 1476  | 0.373            | 0.769            | 953   | 0.242            | 0.256            | 363   | 0.452            | 0.072            |
| 1442  | 0.653            | 0.315            | 945   | 0.033            | -0.001           | 363   | 2.388            | 0.000            |
| 1429  | 0.529            | -0.082           | 860   | -0.075           | 0.000            | 174   | -1.105           | 0.000            |
| 1291  | 0.051            | -0.341           | 846   | -1.181           | 0.000            | 168   | -1.896           | 0.000            |

## References

- [1] R. W. Mitchell, R. W. Glass, and J. A. Merritt. Infrared and reman spectra of some diazanaphthalenes. *J. Mol. Spectr.*, 36:310–327, 1970.
